# Supplementary material for: Promotion of Deoxycholic Acid Effect on Colonic Cancer Cell Lines In Vitro by Altering the Mucosal Microbiota
Source: MDPI journal article supplement (doi:10.3390/microorganisms10122486), 2022-12-15
Supplement: s1 [file s1]

**Supplementary Table S1. Primer sequences of real-time PCR**

| Gene Name       | Froward primer (5'-3') | Reverse primer (5'-3')  |
|-----------------|------------------------|-------------------------|
| <i>18S rRNA</i> | GATATGCTCATGTGGTGTG    | AATCTTCTTCAGTCGCTCCA    |
| <i>SHP</i>      | CCCCAAGGAATATGCCTGCC   | TAGGGCGAAAGAAGAGGTCCC   |
| <i>FGF19</i>    | CCAGAAGACAGGCAGTAGT    | CTGGAGGGA TTTGGGAAGG    |
| <i>FXR</i>      | AACCATACTCGCAATACAGCAA | ACAGCTCA TCCCCTTTGA TCC |

Venn on OTU level

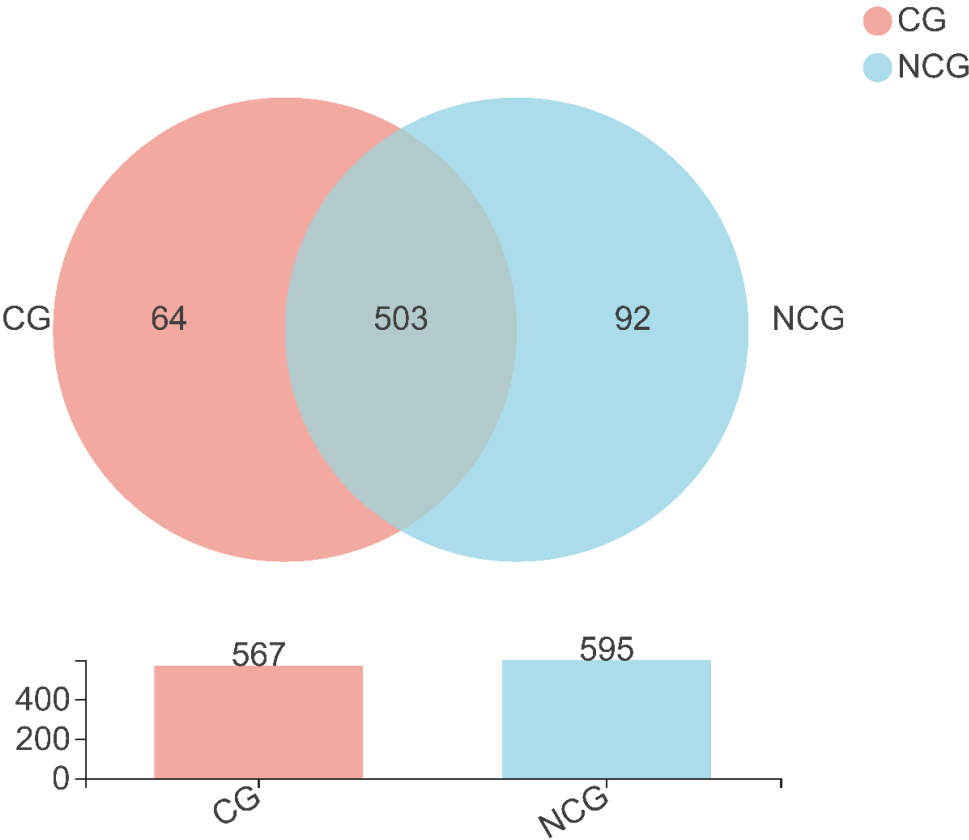

**Supplementary Figure S1.** The richness of bacterium using Venn figure of OTU level between cancerous group and non-cancerous group.

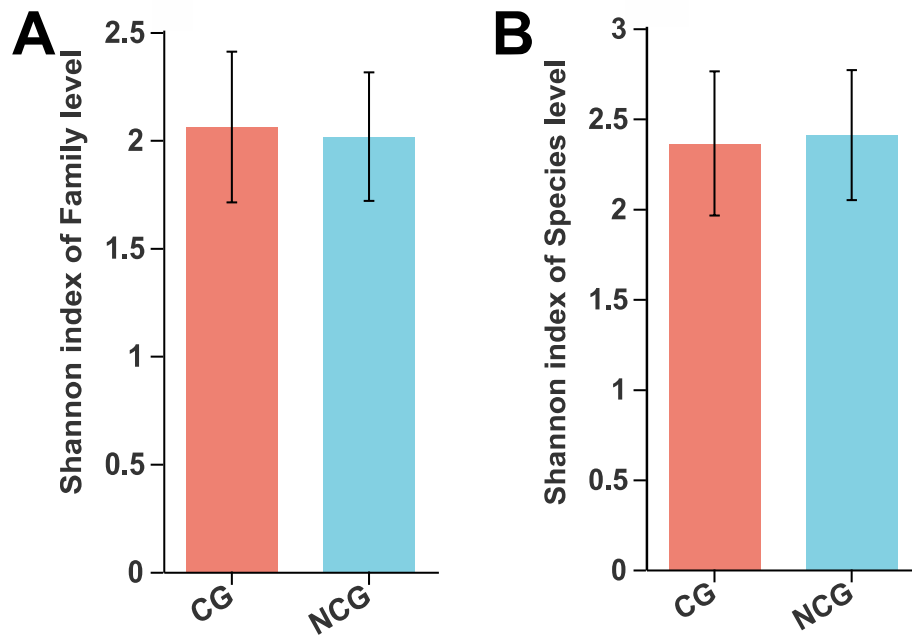

**Supplementary Figure S2.** The  $\alpha$  diversity analysis using Shannon index of Family and Species level between cancerous group and non-cancerous group.
